# Supplementary material
Source: MDPI journal article supplement (https://www.mdpi.com/2073-4395/11/5/846)
Supplement: s1 [file s1]

## Supplementary Materials

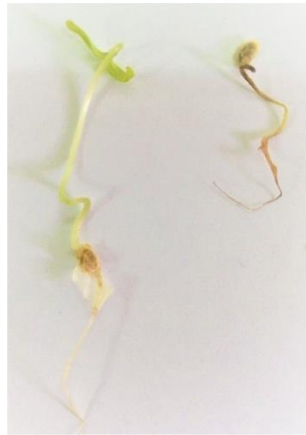

**Figure S1.** Assessment of *Pythium aphanidermatum* pathogenicity on tomato seedlings (*Lycopersicon esculentum* cv. Moneymaker) *in vitro*. Healthy non-inoculated seedling (left) and discolored and *P. aphanidermatum*-killed seedling (right).
